# Supplementary material for: Prenatal experience with language shapes the brain
Source: PubMed Central journal article supplement — Sci Adv. 2023 Nov 22;9(47):eadj3524. doi: 10.1126/sciadv.adj3524 (PMC10664997; doi:10.1126/sciadv.adj3524), 2023-11-22
Supplement: sciadv.adj3524_sm.pdf [file sciadv.adj3524_sm.pdf]

Supplementary Materials for  
**Prenatal experience with language shapes the brain**

Benedetta Mariani *et al.*

Corresponding author: Benedetta Mariani, [benedetta.mariani@studenti.unipd.it](mailto:benedetta.mariani@studenti.unipd.it);  
Judit Gervain, [judit.gervain@unipd.it](mailto:judit.gervain@unipd.it)

*Sci. Adv.* **9**, eadj3524 (2023)  
DOI: 10.1126/sciadv.adj3524

**This PDF file includes:**

Fig. S1  
Tables S1 to S5

**Table S1.**

|                | <b>Set 1</b>                                                                                                                                                                                                                         | <b>Set 2</b>                                                                                                                                                                                                          | <b>Set 3</b>                                                                                                                                                                                                                                     |
|----------------|--------------------------------------------------------------------------------------------------------------------------------------------------------------------------------------------------------------------------------------|-----------------------------------------------------------------------------------------------------------------------------------------------------------------------------------------------------------------------|--------------------------------------------------------------------------------------------------------------------------------------------------------------------------------------------------------------------------------------------------|
| <b>English</b> | <p><i>The bears lived all together in a beautiful house</i></p> <p>Syllables: 13<br/>Duration: 2,50 s<br/>Syllabic rate: 5 Hz<br/>Pitch_min: 142,5 Hz<br/>Pitch_max: 700,8 Hz<br/>Pitch_range: 558,3 Hz<br/>Pitch_mean: 303,4 Hz</p> | <p>The bears decided to take a walk that day</p> <p>Syllables: 11<br/>Duration: 2,16 s<br/>Syllabic rate: 5 Hz<br/>Pitch_min: 181,2 Hz<br/>Pitch_max: 400,2 Hz<br/>Pitch_range: 219,0 Hz<br/>Pitch_mean: 261,8 Hz</p> | <p>The little bears saw that their chairs were used by the naughty girl</p> <p>Syllables: 15<br/>Duration: 2,96 s<br/>Syllabic rate: 4 Hz<br/>Pitch_min: 171,2 Hz<br/>Pitch_max: 735,9 Hz<br/>Pitch_range: 564,7 Hz<br/>Pitch_mean: 322,1 Hz</p> |
| <b>French</b>  | <p>Les ours habitaient tous ensemble dans une maison</p> <p>Syllables: 13<br/>Duration: 2,66 s<br/>Syllabic rate: 4 Hz<br/>Pitch_min: 195,6 Hz<br/>Pitch_max: 556,5 Hz<br/>Pitch_range: 360,9 Hz<br/>Pitch_mean: 307,6 Hz</p>        | <p>Les ours décidèrent d'aller se promener</p> <p>Syllables: 11<br/>Duration: 2,17 s<br/>Syllabic rate: 4 Hz<br/>Pitch_min: 99,7 Hz<br/>Pitch_max: 342,3 Hz<br/>Pitch_range: 242,6 Hz<br/>Pitch_mean: 224,7 Hz</p>    | <p>Les ours virent que leurs chaises avaient été utilisées</p> <p>Syllables: 15<br/>Duration: 2,93 s<br/>Syllabic rate: 6 Hz<br/>Pitch_min: 95,7 Hz<br/>Pitch_max: 263,2 Hz<br/>Pitch_range: 167,5 Hz<br/>Pitch_mean: 190,1 Hz</p>               |
| <b>Spanish</b> | <p>Los osos vivían juntos en una casa</p> <p>Syllables: 13<br/>Duration: 2,60 s<br/>Syllabic rate: 4 Hz<br/>Pitch_min: 164,4 Hz<br/>Pitch_max: 287,3 Hz<br/>Pitch_range: 122,9 Hz<br/>Pitch_mean: 219,8 Hz</p>                       | <p>Los osos tomaron un gran paseo</p> <p>Syllables: 11<br/>Duration: 2,19 s<br/>Syllabic rate: 3 Hz<br/>Pitch_min: 178,2 Hz<br/>Pitch_max: 423,5 Hz<br/>Pitch_range: 245,3 Hz<br/>Pitch_mean: 245,9 Hz</p>            | <p>Los osos vieron sus sillas siendo utilizadas</p> <p>Syllables: 15<br/>Duration: 3,00 s<br/>Syllabic rate: 4 Hz<br/>Pitch_min: 99,0 Hz<br/>Pitch_max: 420,8 Hz<br/>Pitch_range: 321,8 Hz<br/>Pitch_mean: 260,0 Hz</p>                          |

The acoustic measures of the stimuli used in the study: duration, syllabic rate, and pitch details. Table adapted from (23).

Fig. S1.

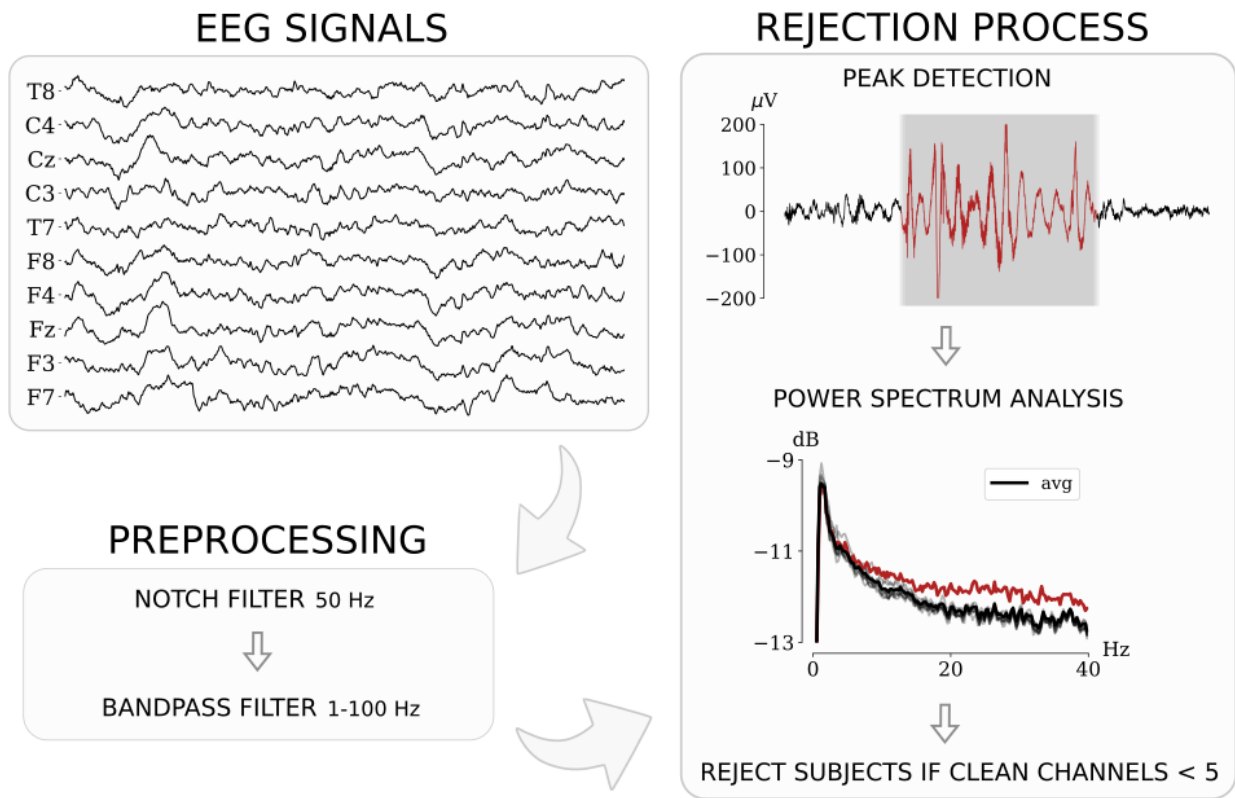

EEG Data Pre-Processing Pipeline

**Table S2.**

|                               | Fixed effects:        | Estimate        | SE               | t value | Pr(> t )     |
|-------------------------------|-----------------------|-----------------|------------------|---------|--------------|
| <b>All subjects</b>           | (Intercept)           | 0.757           | 0.008            | 89.52   | < 2e-16 ***  |
|                               | Silence (slope)       | 0.050           | 0.013            | 3.87    | 0.0005 ***   |
|                               | <i>Random effects</i> | <i>Variance</i> | <i>Std. Dev.</i> |         |              |
|                               | Subject (intercept)   | 0.002           | 0.046            |         |              |
|                               | Silence (slope)       | 0.005           | 0.073            |         |              |
| <b>Last language: French</b>  | (Intercept)           | 0.757           | 0.012            | 64.12   | < 2e-16 ***  |
|                               | Silence (slope)       | 0.065           | 0.013            | 4.94    | 0.0003 ***   |
|                               | <i>Random effects</i> | <i>Variance</i> | <i>Std. Dev.</i> |         |              |
|                               | Subject (intercept)   | 0.002           | 0.039            |         |              |
|                               | Silence (slope)       | 0.002           | 0.041            |         |              |
| <b>Last language: Spanish</b> | (Intercept)           | 0.756           | 0.014            | 55.07   | 2.22e-12 *** |
|                               | Silence (slope)       | 0.052           | 0.032            | 1.64    | 0.14         |
|                               | <i>Random effects</i> | <i>Variance</i> | <i>Std. Dev.</i> |         |              |
|                               | Subject (intercept)   | 0.002           | 0.039            |         |              |
|                               | Silence (slope)       | 0.009           | 0.093            |         |              |
| <b>Last language: English</b> | (Intercept)           | 0.758           | 0.017            | 44.03   | 9.03e-15 *** |
|                               | Silence (slope)       | 0.036           | 0.023            | 1.54    | 0.15         |
|                               | <i>Random effects</i> | <i>Variance</i> | <i>Std. Dev.</i> |         |              |
|                               | Subject (intercept)   | 0.003           | 0.058            |         |              |
|                               | Silence (slope)       | 0.006           | 0.078            |         |              |

Linear mixed effects model results: Theta band.

**Table S3.**

|                               | Fixed effects         | Estimate        | SE               | t value | Pr(> t )     |
|-------------------------------|-----------------------|-----------------|------------------|---------|--------------|
| <b>All subjects</b>           | (Intercept)           | 0.954           | 0.022            | 44.01   | <2e-16 ***   |
|                               | Silence (slope)       | -0.069          | 0.027            | -2.60   | 0.014 *      |
|                               | <i>Random effects</i> | <i>Variance</i> | <i>Std. Dev.</i> |         |              |
|                               | Subject (intercept)   | 0.015           | 0.124            |         |              |
|                               | Silence (slope)       | 0.023           | 0.150            |         |              |
| <b>Last language: French</b>  | (Intercept)           | 0.970           | 0.095            | 35.07   | 1.88e-13 *** |
|                               | Silence (slope)       | -0.043          | 0.039            | -1.08   | 0.3          |
|                               | <i>Random effects</i> | <i>Variance</i> | <i>Std. Dev.</i> |         |              |
|                               | Subject (intercept)   | 0.009           | 0.039            |         |              |
|                               | Silence (slope)       | 0.018           | 0.136            |         |              |
| <b>Last language: Spanish</b> | (Intercept)           | 0.875           | 0.054            | 16.11   | 6.06e-08 *** |
|                               | Silence (slope)       | -0.015          | 0.055            | -0.27   | 0.79         |
|                               | <i>Random effects</i> | <i>Variance</i> | <i>Std. Dev.</i> |         |              |
|                               | Subject (intercept)   | 0.026           | 0.162            |         |              |
|                               | Silence (slope)       | 0.027           | 0.163            |         |              |
| <b>Last language: English</b> | (Intercept)           | 0.998           | 0.023            | 42.48   | 2.08e-14 *** |
|                               | Silence (slope)       | -0.136          | 0.038            | -3.60   | 0.004 **     |
|                               | <i>Random effects</i> | <i>Variance</i> | <i>Std. Dev.</i> |         |              |
|                               | Subject (intercept)   | 0.006           | 0.080            |         |              |
|                               | Silence (slope)       | 0.017           | 0.129            |         |              |

Linear mixed effects model results: Gamma band.

**Table S4.**

|                                   | <i>AIC DFAexp ~ Silence + (1 + Silence Subject) model</i> | <i>AIC DFAexp ~ (1 + Silence Subject) model</i> | Pr(>Chisq)    |
|-----------------------------------|-----------------------------------------------------------|-------------------------------------------------|---------------|
| <b>All subjects</b>               | -1879.7                                                   | -1869.4                                         | 0.0004<br>*** |
| <b>Last language:<br/>French</b>  | -712.30                                                   | -700.99                                         | 0.0003<br>*** |
| <b>Last language:<br/>Spanish</b> | -510.95                                                   | -510.60                                         | 0.12          |
| <b>Last language:<br/>English</b> | -642.48                                                   | -642.30                                         | 0.14          |

Linear Mixed Effects Model Selection: Theta band.

**Table S5.**

|                                   | <i>AIC DFAexp ~ Silence + (1 + Silence Subject) model</i> | <i>AIC DFAexp ~ (1 + Silence Subject) model</i> | Pr(>Chisq) |
|-----------------------------------|-----------------------------------------------------------|-------------------------------------------------|------------|
| <b>All subjects</b>               | -1710.7                                                   | -1706.5                                         | 0.013 *    |
| <b>Last language:<br/>French</b>  | -729.02                                                   | -729.91                                         | 0.29       |
| <b>Last language:<br/>Spanish</b> | -383.07                                                   | -384.99                                         | 0.78       |
| <b>Last language:<br/>English</b> | -636.17                                                   | -629.38                                         | 0.003 **   |

Linear Mixed Effects Model Selection: Gamma band.
